# Supplementary material for: Gas phase chemistry of N-benzylbenzamides with silver(i) cations: characterization of benzylsilver cation
Source: Royal Society of Chemistry journal article supplement (doi:10.1039/c4ob02355b), 2015-01-01
Supplement: c4ob02355b1.pdf [file c4ob02355b1.pdf]

## Gas phase Chemistry of *N*-benzylbenzamides with silver(I) cation:

### Characterization of benzylsilver cation

Hezhi Sun,<sup>a</sup> Zhe Jin,<sup>a</sup> Hong Quan,<sup>b</sup> Cuirong Sun<sup>b\*</sup> and Yuanjiang Pan<sup>a\*</sup>

<sup>a</sup> Corresponding to Yuanjiang Pan, Department of Chemistry, Zhejiang University, Hangzhou 310027, Zhejiang, China. Email: panyuanjiang@zju.edu.cn

<sup>b</sup> College of Pharmaceutical Sciences, Zhejiang University, Hangzhou 310058, Zhejiang, China.

### *Supporting information*

| <b>Table of contents</b>                                                            | <b>Page</b> |
|-------------------------------------------------------------------------------------|-------------|
| 1. Experimental Section                                                             | S2          |
| 2. Table of accurate masses, Figures of complexes studied and DFT potential surface | S5          |
| 3. Results of DFT calculations                                                      | S9          |

# Experimental Section

## 1. Chemicals

The *N*-benzylbenzamides were synthesized and purified according to previous reported procedures<sup>9</sup>. The structures were confirmed by <sup>1</sup>H and <sup>13</sup>C NMR spectroscopy and mass spectrometry. *N*-benzylbenzamide, <sup>1</sup>H NMR (CDCl<sub>3</sub>, 500 MHz): δ 7.80 (d, 2H), 7.50 (t, 1H), 7.42 (t, 2H), 7.27-7.40 (m, 5H), 6.65 (b, 1H), 4.63 (d, 2H); <sup>13</sup>C NMR (CDCl<sub>3</sub>, 125 MHz): δ 167.64, 138.43, 134.57, 313.75, 128.97, 128.78, 128.10, 127.79, 127.21, 44.31; HRMS calc for C<sub>14</sub>H<sub>14</sub>NO<sup>+</sup>([Cmpd **1** + H]<sup>+</sup>): 212.1075, found: 212.1079.

## 2. Mass Spectrometry

The CID experiments were performed in the positive-ion mode using a Varian 500-MS mass spectrometer equipped with an electrospray source and an ion trap analyzer. Dilute methanol solutions containing samples were introduced to the ion source with a syringe pump at a flow rate of 10 μL min<sup>-1</sup> and relevant parameters were set as below: spray chamber temperature, 50 °C; drying gas temperature, 350 °C ; needle voltage, 5000V; capillary voltage, 80 V; spray shield voltage, 600V; RF loading, 85%; scan mode, standard. Nitrogen was used as nebulizing gas at a pressure of 35 psi and drying gas at a pressure of 15 psi. The CID mass spectra were obtained with helium as the collision gas at appropriate collision energy after isolation of the desired precursor ion. Data reported in the article was acquired through a Varian MS Workstation.

A TripleTOF®4600 system with a DuoSpray™ ion source operating was operated in the positive-ion mode for accurate mass spectrometric experiments. The APCI probe of the source was used for fully automatic mass calibration using the Calibrant Delivery System (CDS). A calibration solution matching polarity of ionization was injected during CDS and the mass axis of the TripleTOF® system was correspondingly calibrated in all scan functions used (MS or MS/MS). Solutions were

infused from the ESI source at  $10 \mu\text{L min}^{-1}$  with the parameters: ion spray voltage floating, 5500 V; temperature, 550 °C; curtain gas, 25 psi, ion source gas, 40 psi. The CE was 40 eV, and the CES was 15 eV in the MS/MS experiments.

The accurate mass spectrometric experiments (data in Table S1) were operated in the positive-ion mode of a TripleTOF®4600 system with a DuoSpray™ ion source (AB SCIEX, Foster City, CA, USA). The APCI probe of the source was used for fully automatic mass calibration using the Calibrant Delivery System (CDS). A calibration solution matching polarity of ionization was injected during CDS and the mass axis of the TripleTOF®4600 system was correspondingly calibrated in all scan functions used (MS or MS/MS). Solutions were infused from the ESI source at  $10 \mu\text{L min}^{-1}$  with the parameters: ion spray voltage floating, 5500 V; temperature, 550 °C; curtain gas, 25 psi, ion source gas, 40 psi. Nitrogen was used both as the curtain gas and ion source gas. The CE was 40 eV, and the CES was 15 eV in the MS/MS experiments.

All compounds were purified after synthesis and mixed with 1 equiv of silver nitrate aqueous solution in methanol. The mixtures were infused to the mass spectrometer at a final concentration of approximate  $1 \mu\text{g mL}^{-1}$ , with a syringe pump at a flow rate of  $180 \mu\text{L h}^{-1}$ . All product ion spectra involving  $\text{Ag}^+$  will be those of the  $^{107}\text{Ag}$  isotope and no subsequent isotope identification will be made from now on.

### 3. Theoretical calculations

Theoretical calculations were performed using the Gaussian 03 package of programs. All structures were optimized by density functional theory (DFT) using the RB3LYP hybrid method: LANL2DZ basis set for silver while 6-311+G(*d,p*) basis set for the other atoms. No symmetry constraints were imposed on the optimizations. All optimized structures were subjected to vibrational frequency analysis to ensure they corresponded to either true minima (no imaginary frequencies) or transition states (1 imaginary frequency). The reaction pathways were traced forward and backward by the intrinsic reaction coordinate (IRC) method. Considering the existence of the weakly bonded interactions involved, a vibrational frequency scaling factor of 0.967 is applied to the B3LYP/6-311G+(*d,p*) harmonic vibrational frequencies, which refers the NIST database available on the Internet.<sup>17</sup> All optimized structures were subjected

to vibrational frequency analysis for zero-point energies (ZPE) correction to the temperature at 298.15 K. While the effect of basis set superposition error (BSSE) was analyzed by means of the counterpoise correction method. The energies discussed below are the Gibbs free energies.

# Table of accurate masses, Figures of complexes studied and DFT potential surface

**Table S1.** Accurate masses of the product ions in the fragmentation of the  $[M + {}^{107}\text{Ag}]^+$  ion of Cmpd 1.

| Precursor ions | Product ions | formula                                   | Calculated mass | Measured mass | Error (ppm) |
|----------------|--------------|-------------------------------------------|-----------------|---------------|-------------|
| 318            |              | $\text{C}_{14}\text{H}_{13}\text{AgNO}^+$ | 318.0048        | 318.0052      | 1.3         |
|                | 210          | $\text{C}_{14}\text{H}_{12}\text{NO}^+$   | 210.0919        | 210.0923      | 1.9         |
|                | 197          | $\text{C}_7\text{H}_6\text{Ag}^+$         | 196.9520        | 196.9521      | 0.5         |
|                | 107          | $\text{Ag}^+$                             | 106.9051        | 106.9045      | -5.6        |
|                | 105          | $\text{C}_7\text{H}_5\text{O}^+$          | 105.0340        | 105.0339      | -1.0        |
|                | 91           | $\text{C}_7\text{H}_7^+$                  | 91.0548         | 91.0546       | -2.2        |

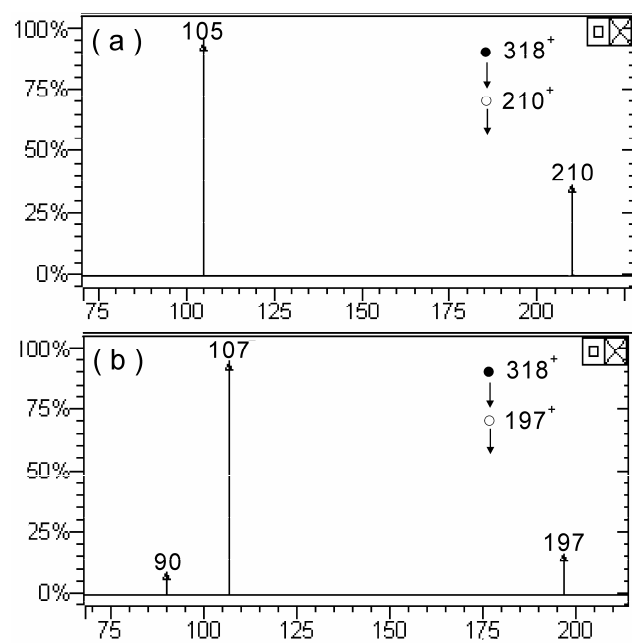

**Figure S1.** CID spectra of the ion at (a)  $m/z$  210 and (b)  $m/z$  197 derived from the fragmentation of argintinated *N*-benzylbenzamide.

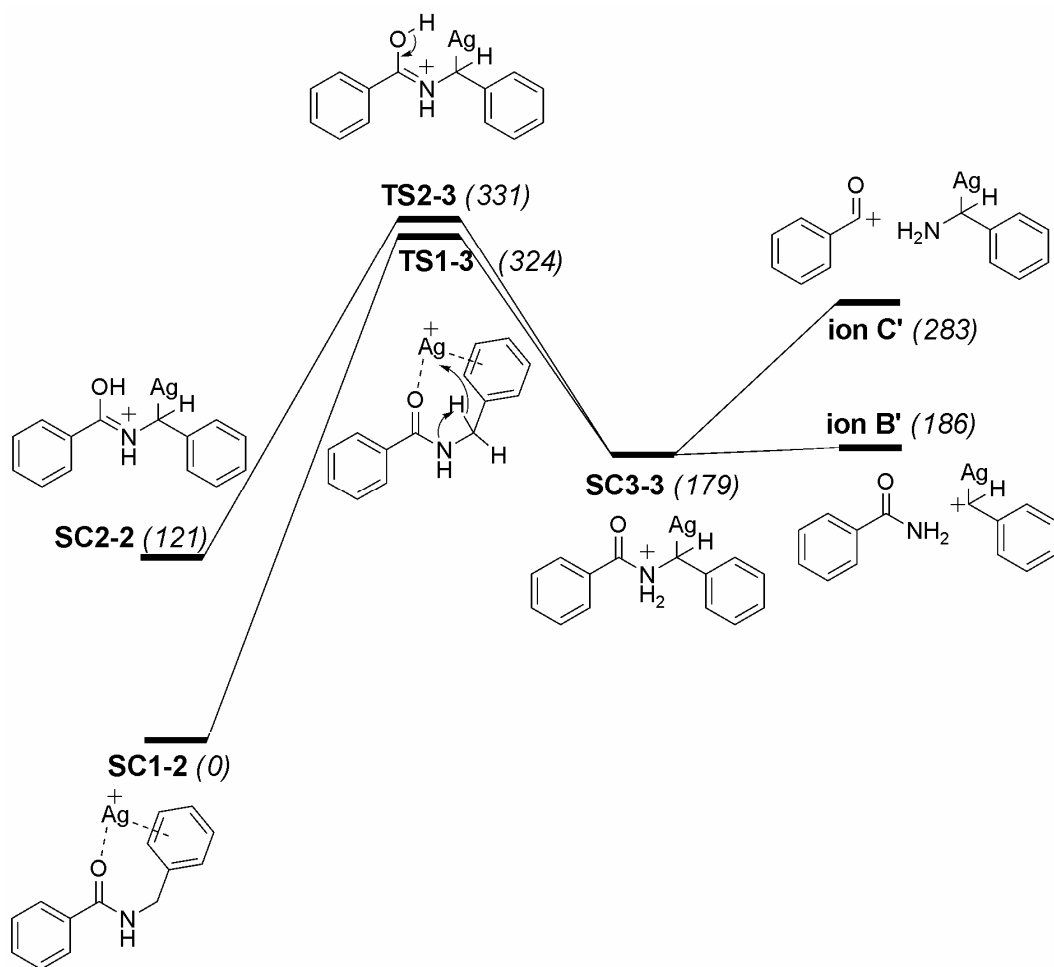

**Figure S2.** DFT potential energy surfaces of less possible pathways for formation of ion **B** and ion **C**. All energy values are in  $\text{kJ mol}^{-1}$ .

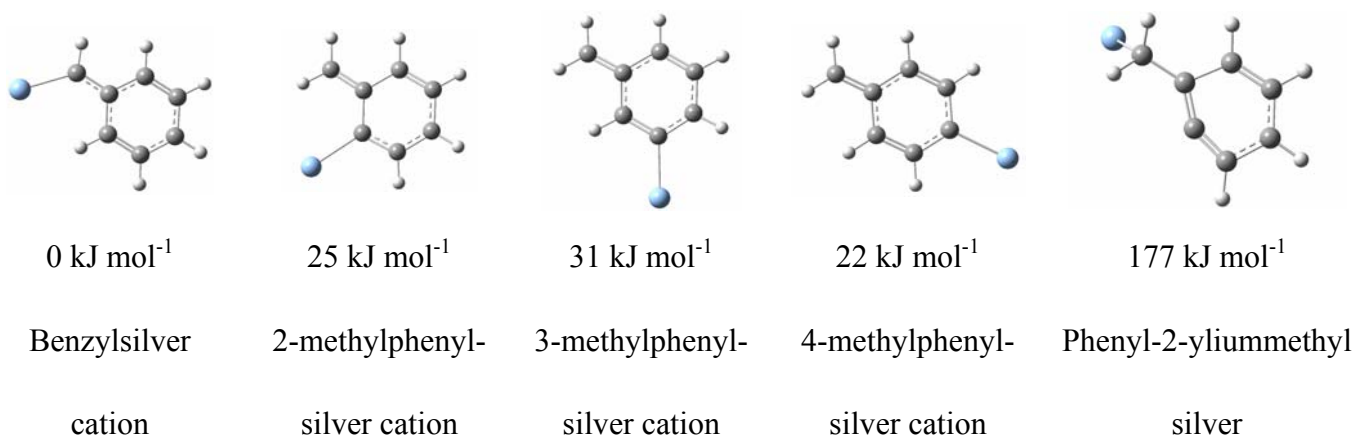

**Figure S3.** Gibbs free energies of different isomers of  $\text{C}_7\text{H}_6\text{Ag}^+$  relative to benzylsilver cation using the theoretical calculation method described above.

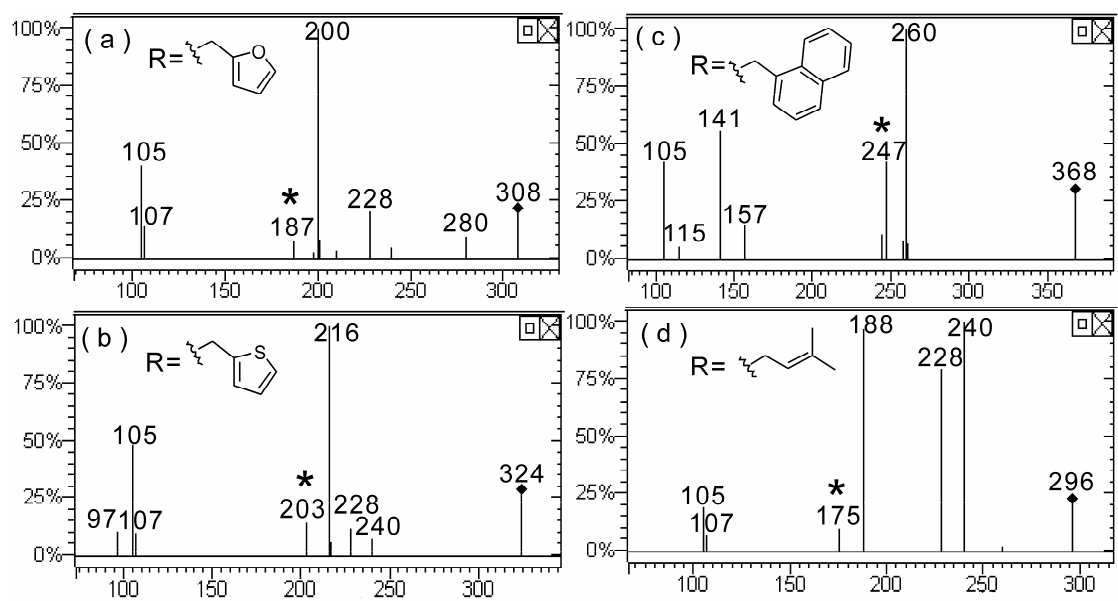

**Figure S4.** CID mass spectra of argeninated PhCONH-R, with R = (a) furfurylmethyl, (b) thienylmethyl, (c) naphthylmethyl and (d) 3-methyl-2-butenyl.



# Results of DFT calculations

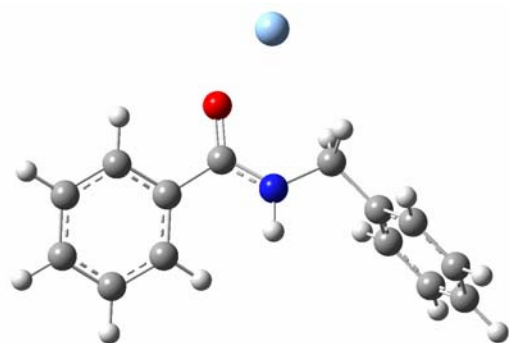

---

| Center Number | Atomic Number | Atomic Type | Coordinates (Angstroms) |           |           |
|---------------|---------------|-------------|-------------------------|-----------|-----------|
|               |               |             | X                       | Y         | Z         |
| 1             | 6             | 0           | -2.687715               | -3.652373 | -0.374364 |
| 2             | 6             | 0           | -1.716010               | -2.657995 | -0.380793 |
| 3             | 6             | 0           | -2.044208               | -1.353082 | 0.016476  |
| 4             | 6             | 0           | -3.358627               | -1.056494 | 0.401540  |
| 5             | 6             | 0           | -4.322945               | -2.057070 | 0.415571  |
| 6             | 6             | 0           | -3.989179               | -3.354936 | 0.029323  |
| 7             | 1             | 0           | -2.432725               | -4.655464 | -0.693903 |
| 8             | 1             | 0           | -0.720508               | -2.902010 | -0.735182 |
| 9             | 1             | 0           | -3.610574               | -0.045802 | 0.694736  |
| 10            | 1             | 0           | -5.334747               | -1.825705 | 0.725809  |
| 11            | 1             | 0           | -4.743559               | -4.132792 | 0.035441  |
| 12            | 6             | 0           | -1.042202               | -0.258699 | 0.027365  |
| 13            | 8             | 0           | -1.440360               | 0.933442  | -0.079229 |
| 14            | 7             | 0           | 0.250576                | -0.578374 | 0.156250  |
| 15            | 1             | 0           | 0.484690                | -1.546105 | 0.326316  |
| 16            | 6             | 0           | 1.377785                | 0.365005  | 0.119364  |
| 17            | 1             | 0           | 1.343300                | 1.007596  | 1.007180  |
| 18            | 1             | 0           | 1.273899                | 0.993144  | -0.773266 |
| 19            | 6             | 0           | 2.694969                | -0.374415 | 0.075556  |
| 20            | 6             | 0           | 3.400766                | -0.628812 | 1.255187  |
| 21            | 6             | 0           | 3.207722                | -0.830235 | -1.143928 |
| 22            | 6             | 0           | 4.602170                | -1.334331 | 1.217021  |
| 23            | 1             | 0           | 3.017192                | -0.271507 | 2.205685  |

---

|    |    |   |           |           |           |
|----|----|---|-----------|-----------|-----------|
| 24 | 6  | 0 | 4.407992  | -1.535502 | -1.181026 |
| 25 | 1  | 0 | 2.673783  | -0.628645 | -2.067387 |
| 26 | 6  | 0 | 5.105509  | -1.788572 | -0.000301 |
| 27 | 1  | 0 | 5.145413  | -1.523597 | 2.135213  |
| 28 | 1  | 0 | 4.801698  | -1.880458 | -2.129778 |
| 29 | 1  | 0 | 6.041712  | -2.333307 | -0.030365 |
| 30 | 47 | 0 | -0.680572 | 2.966613  | -0.085582 |

-----

Zero-point correction= 0.229623 (Hartree/Particle)  
 Thermal correction to Energy= 0.245616  
 Thermal correction to Enthalpy= 0.246560  
 Thermal correction to Gibbs Free Energy= 0.181218  
 Sum of electronic and zero-point Energies= -816.816527  
 Sum of electronic and thermal Energies= -816.800534  
 Sum of electronic and thermal Enthalpies= -816.799590  
 Sum of electronic and thermal Free Energies= -816.864932  
 Counterpoise: corrected energy = -817.045256109635  
 Counterpoise: BSSE energy = 0.000894306530

**No imaginary vibrational frequency**

TS1-1

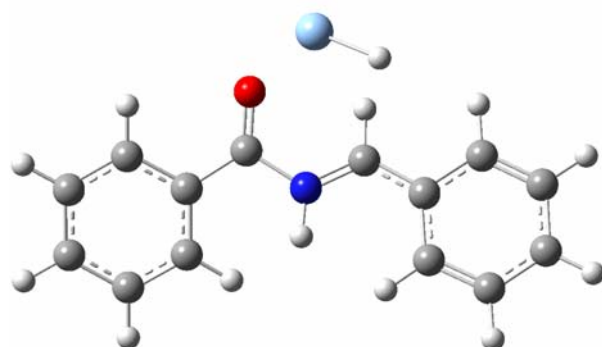

-----

| Center Number | Atomic Number | Atomic Type | Coordinates (Angstroms) |           |           |
|---------------|---------------|-------------|-------------------------|-----------|-----------|
|               |               |             | X                       | Y         | Z         |
| 1             | 6             | 0           | 4.015570                | -2.665509 | -0.139005 |
| 2             | 6             | 0           | 2.760572                | -2.116221 | 0.087005  |
| 3             | 6             | 0           | 2.613907                | -0.722125 | 0.207993  |
| 4             | 6             | 0           | 3.746159                | 0.105909  | 0.111302  |
| 5             | 6             | 0           | 4.994719                | -0.449796 | -0.124981 |
| 6             | 6             | 0           | 5.130586                | -1.833673 | -0.252308 |
| 7             | 1             | 0           | 4.128280                | -3.739681 | -0.218099 |
| 8             | 1             | 0           | 1.919391                | -2.789452 | 0.212543  |
| 9             | 1             | 0           | 3.627965                | 1.176409  | 0.219343  |

-----

|    |    |   |           |           |           |
|----|----|---|-----------|-----------|-----------|
| 10 | 1  | 0 | 5.863579  | 0.191347  | -0.208414 |
| 11 | 1  | 0 | 6.107553  | -2.265999 | -0.433657 |
| 12 | 6  | 0 | 1.326422  | -0.071798 | 0.471295  |
| 13 | 8  | 0 | 1.171234  | 1.067637  | 0.858706  |
| 14 | 7  | 0 | 0.146259  | -0.871569 | 0.207907  |
| 15 | 1  | 0 | 0.270663  | -1.713761 | -0.340952 |
| 16 | 6  | 0 | -1.072620 | -0.483071 | 0.543989  |
| 17 | 1  | 0 | -1.918842 | 2.324548  | -0.996360 |
| 18 | 1  | 0 | -1.111855 | 0.414095  | 1.149875  |
| 19 | 6  | 0 | -2.282306 | -1.163725 | 0.233490  |
| 20 | 6  | 0 | -2.343654 | -2.328995 | -0.568121 |
| 21 | 6  | 0 | -3.474662 | -0.634919 | 0.781717  |
| 22 | 6  | 0 | -3.558680 | -2.943664 | -0.799019 |
| 23 | 1  | 0 | -1.451179 | -2.749951 | -1.018361 |
| 24 | 6  | 0 | -4.687638 | -1.260580 | 0.548277  |
| 25 | 1  | 0 | -3.432313 | 0.270650  | 1.375614  |
| 26 | 6  | 0 | -4.729773 | -2.411902 | -0.240195 |
| 27 | 1  | 0 | -3.609356 | -3.833065 | -1.414517 |
| 28 | 1  | 0 | -5.598796 | -0.853988 | 0.968522  |
| 29 | 1  | 0 | -5.679294 | -2.899339 | -0.428841 |
| 30 | 47 | 0 | -0.513640 | 2.721457  | -0.262986 |

---

Zero-point correction= 0.222777 (Hartree/Particle)  
Thermal correction to Energy= 0.239123  
Thermal correction to Enthalpy= 0.240067  
Thermal correction to Gibbs Free Energy= 0.174557  
Sum of electronic and zero-point Energies= -816.769096  
Sum of electronic and thermal Energies= -816.752749  
Sum of electronic and thermal Enthalpies= -816.751805  
Sum of electronic and thermal Free Energies= -816.817315

Counterpoise: corrected energy = -816.989375960640

Counterpoise: BSSE energy = 0.002496431065

**One imaginary vibrational frequency: -116.524**

AgH

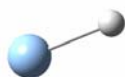


---

| Center Number | Atomic Number | Atomic Type | Coordinates (Angstroms) |   |   |
|---------------|---------------|-------------|-------------------------|---|---|
|               |               |             | X                       | Y | Z |

---

|   |    |   |          |          |           |
|---|----|---|----------|----------|-----------|
| 1 | 47 | 0 | 0.000000 | 0.000000 | 0.033886  |
| 2 | 1  | 0 | 0.000000 | 0.000000 | -1.592624 |

---

|                                              |                             |
|----------------------------------------------|-----------------------------|
| Zero-point correction=                       | 0.003762 (Hartree/Particle) |
| Thermal correction to Energy=                | 0.006125                    |
| Thermal correction to Enthalpy=              | 0.007069                    |
| Thermal correction to Gibbs Free Energy=     | -0.016144                   |
| Sum of electronic and zero-point Energies=   | -146.340760                 |
| Sum of electronic and thermal Energies=      | -146.338397                 |
| Sum of electronic and thermal Enthalpies=    | -146.337453                 |
| Sum of electronic and thermal Free Energies= | -146.360665                 |

**No imaginary vibrational frequency**

Ion A

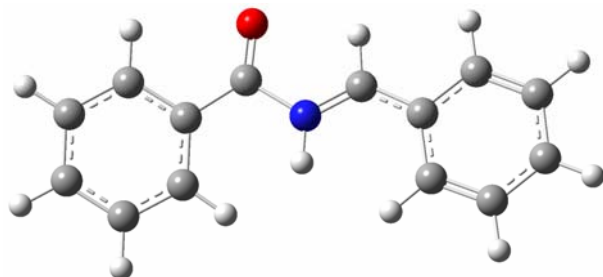


---

| Center Number | Atomic Number | Atomic Type | Coordinates (Angstroms) |           |           |
|---------------|---------------|-------------|-------------------------|-----------|-----------|
|               |               |             | X                       | Y         | Z         |
| 1             | 6             | 0           | 3.728912                | 1.806423  | -0.124409 |
| 2             | 6             | 0           | 2.499135                | 1.162651  | -0.161983 |
| 3             | 6             | 0           | 2.430282                | -0.235990 | -0.029593 |
| 4             | 6             | 0           | 3.616545                | -0.973035 | 0.140760  |
| 5             | 6             | 0           | 4.840982                | -0.323391 | 0.177286  |
| 6             | 6             | 0           | 4.898945                | 1.065348  | 0.044942  |
| 7             | 1             | 0           | 3.777158                | 2.883399  | -0.226744 |
| 8             | 1             | 0           | 1.616242                | 1.778270  | -0.295160 |
| 9             | 1             | 0           | 3.555127                | -2.048994 | 0.241964  |
| 10            | 1             | 0           | 5.751044                | -0.895634 | 0.308648  |
| 11            | 1             | 0           | 5.856469                | 1.571899  | 0.073675  |
| 12            | 6             | 0           | 1.183807                | -1.010550 | -0.055560 |
| 13            | 8             | 0           | 1.075648                | -2.204631 | -0.105631 |
| 14            | 7             | 0           | -0.073429               | -0.225625 | -0.015503 |
| 15            | 1             | 0           | -0.019585               | 0.784580  | 0.026503  |
| 16            | 6             | 0           | -1.237570               | -0.827096 | -0.034297 |
| 17            | 1             | 0           | -1.162723               | -1.911418 | -0.080195 |

|    |   |   |           |           |           |
|----|---|---|-----------|-----------|-----------|
| 18 | 6 | 0 | -2.524007 | -0.220107 | -0.001748 |
| 19 | 6 | 0 | -2.734712 | 1.178827  | 0.057983  |
| 20 | 6 | 0 | -3.639186 | -1.090569 | -0.032030 |
| 21 | 6 | 0 | -4.020736 | 1.680368  | 0.086115  |
| 22 | 1 | 0 | -1.900434 | 1.871321  | 0.082342  |
| 23 | 6 | 0 | -4.926306 | -0.577526 | -0.003412 |
| 24 | 1 | 0 | -3.479826 | -2.162025 | -0.077790 |
| 25 | 6 | 0 | -5.115784 | 0.803559  | 0.055483  |
| 26 | 1 | 0 | -4.186336 | 2.749450  | 0.131788  |
| 27 | 1 | 0 | -5.778575 | -1.244803 | -0.026640 |
| 28 | 1 | 0 | -6.121588 | 1.206906  | 0.077949  |

---

|                                              |                             |
|----------------------------------------------|-----------------------------|
| Zero-point correction=                       | 0.218021 (Hartree/Particle) |
| Thermal correction to Energy=                | 0.230662                    |
| Thermal correction to Enthalpy=              | 0.231606                    |
| Thermal correction to Gibbs Free Energy=     | 0.177772                    |
| Sum of electronic and zero-point Energies=   | -670.419275                 |
| Sum of electronic and thermal Energies=      | -670.406634                 |
| Sum of electronic and thermal Enthalpies=    | -670.405690                 |
| Sum of electronic and thermal Free Energies= | -670.459524                 |

**No imaginary vibrational frequency**

Ion C

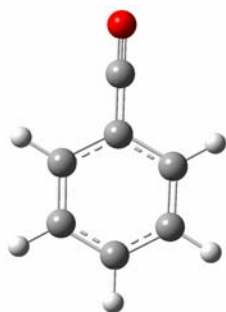


---

| Center Number | Atomic Number | Atomic Type | Coordinates (Angstroms) |           |           |
|---------------|---------------|-------------|-------------------------|-----------|-----------|
|               |               |             | X                       | Y         | Z         |
| 1             | 6             | 0           | 1.511254                | -1.222604 | -0.000032 |
| 2             | 6             | 0           | 0.130541                | -1.244846 | 0.000027  |
| 3             | 6             | 0           | -0.555410               | -0.000142 | -0.000036 |
| 4             | 6             | 0           | 0.130351                | 1.244741  | -0.000067 |
| 5             | 6             | 0           | 1.510958                | 1.222814  | 0.000042  |
| 6             | 6             | 0           | 2.194815                | 0.000130  | 0.000019  |
| 7             | 1             | 0           | 2.061872                | -2.154899 | -0.000046 |
| 8             | 1             | 0           | -0.418294               | -2.178338 | -0.000011 |

|    |   |   |           |           |           |
|----|---|---|-----------|-----------|-----------|
| 9  | 1 | 0 | -0.418991 | 2.177933  | -0.000064 |
| 10 | 1 | 0 | 2.061402  | 2.155198  | 0.000082  |
| 11 | 1 | 0 | 3.278849  | 0.000190  | 0.000048  |
| 12 | 6 | 0 | -1.934337 | -0.000186 | 0.000021  |
| 13 | 8 | 0 | -3.061733 | 0.000059  | 0.000019  |

---

|                                              |                             |
|----------------------------------------------|-----------------------------|
| Zero-point correction=                       | 0.095736 (Hartree/Particle) |
| Thermal correction to Energy=                | 0.102065                    |
| Thermal correction to Enthalpy=              | 0.103009                    |
| Thermal correction to Gibbs Free Energy=     | 0.065142                    |
| Sum of electronic and zero-point Energies=   | -344.682596                 |
| Sum of electronic and thermal Energies=      | -344.676268                 |
| Sum of electronic and thermal Enthalpies=    | -344.675323                 |
| Sum of electronic and thermal Free Energies= | -344.713191                 |

**No imaginary vibrational frequency**

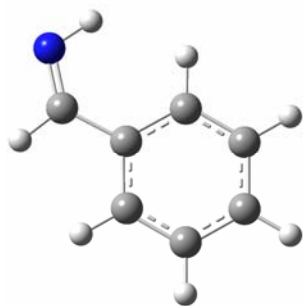


---

| Center Number | Atomic Number | Atomic Type | Coordinates (Angstroms) |           |          |
|---------------|---------------|-------------|-------------------------|-----------|----------|
|               |               |             | X                       | Y         | Z        |
| 1             | 7             | 0           | -1.350061               | 2.668661  | 0.000000 |
| 2             | 1             | 0           | -2.154173               | 2.035179  | 0.000000 |
| 3             | 6             | 0           | -0.247538               | 2.032173  | 0.000000 |
| 4             | 1             | 0           | 0.662993                | 2.639310  | 0.000000 |
| 5             | 6             | 0           | 0.000000                | 0.570165  | 0.000000 |
| 6             | 6             | 0           | -1.033222               | -0.377573 | 0.000000 |
| 7             | 6             | 0           | 1.325857                | 0.118290  | 0.000000 |
| 8             | 6             | 0           | -0.745723               | -1.736985 | 0.000000 |
| 9             | 1             | 0           | -2.069081               | -0.054930 | 0.000000 |
| 10            | 6             | 0           | 1.616965                | -1.243637 | 0.000000 |
| 11            | 1             | 0           | 2.132475                | 0.844422  | 0.000000 |
| 12            | 6             | 0           | 0.580698                | -2.174526 | 0.000000 |
| 13            | 1             | 0           | -1.554338               | -2.459100 | 0.000000 |
| 14            | 1             | 0           | 2.648424                | -1.577134 | 0.000000 |

15            1            0            0.801906    -3.235822    0.000000

-----  
 Zero-point correction=                    0.117855 (Hartree/Particle)  
 Thermal correction to Energy=            0.124634  
 Thermal correction to Enthalpy=         0.125578  
 Thermal correction to Gibbs Free Energy= 0.086398  
 Sum of electronic and zero-point Energies= -325.663877  
 Sum of electronic and thermal Energies= -325.657098  
 Sum of electronic and thermal Enthalpies= -325.656154  
 Sum of electronic and thermal Free Energies= -325.695334

**No imaginary vibrational frequency**

SC1-2

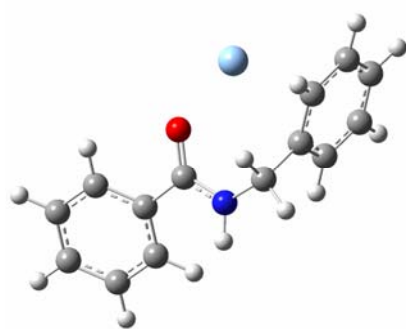

| Center Number | Atomic Number | Atomic Type | Coordinates (Angstroms) |           |           |
|---------------|---------------|-------------|-------------------------|-----------|-----------|
|               |               |             | X                       | Y         | Z         |
| 1             | 6             | 0           | 4.745789                | 1.331693  | -0.501983 |
| 2             | 6             | 0           | 3.412715                | 1.340861  | -0.106885 |
| 3             | 6             | 0           | 2.741562                | 0.133134  | 0.137761  |
| 4             | 6             | 0           | 3.422914                | -1.079791 | -0.031779 |
| 5             | 6             | 0           | 4.758390                | -1.083311 | -0.416615 |
| 6             | 6             | 0           | 5.421431                | 0.120739  | -0.651923 |
| 7             | 1             | 0           | 5.254844                | 2.266951  | -0.701042 |
| 8             | 1             | 0           | 2.900872                | 2.294241  | -0.031381 |
| 9             | 1             | 0           | 2.898575                | -2.008538 | 0.151801  |
| 10            | 1             | 0           | 5.282568                | -2.024118 | -0.533922 |
| 11            | 1             | 0           | 6.461306                | 0.116708  | -0.956709 |
| 12            | 6             | 0           | 1.318924                | 0.075004  | 0.563039  |
| 13            | 8             | 0           | 0.655678                | -0.973323 | 0.411508  |
| 14            | 7             | 0           | 0.779782                | 1.179042  | 1.132483  |
| 15            | 1             | 0           | 1.407979                | 1.933592  | 1.361390  |
| 16            | 6             | 0           | -0.568458               | 1.233227  | 1.697930  |
| 17            | 1             | 0           | -0.629756               | 2.160004  | 2.273029  |

|    |    |   |           |           |           |
|----|----|---|-----------|-----------|-----------|
| 18 | 1  | 0 | -0.700245 | 0.410994  | 2.406284  |
| 19 | 6  | 0 | -1.687560 | 1.208221  | 0.666087  |
| 20 | 6  | 0 | -1.662409 | 2.030291  | -0.462298 |
| 21 | 6  | 0 | -2.809330 | 0.368902  | 0.867191  |
| 22 | 6  | 0 | -2.718381 | 2.021621  | -1.374635 |
| 23 | 1  | 0 | -0.814315 | 2.684133  | -0.630994 |
| 24 | 6  | 0 | -3.864778 | 0.353315  | -0.066114 |
| 25 | 1  | 0 | -2.917960 | -0.168026 | 1.807091  |
| 26 | 6  | 0 | -3.813702 | 1.179214  | -1.188443 |
| 27 | 1  | 0 | -2.684680 | 2.678673  | -2.235763 |
| 28 | 1  | 0 | -4.733757 | -0.267692 | 0.118869  |
| 29 | 1  | 0 | -4.629778 | 1.178864  | -1.900543 |
| 30 | 47 | 0 | -1.488983 | -1.428111 | -0.151820 |

---

Zero-point correction= 0.230090 (Hartree/Particle)  
 Thermal correction to Energy= 0.245759  
 Thermal correction to Enthalpy= 0.246703  
 Thermal correction to Gibbs Free Energy= 0.184131  
 Sum of electronic and zero-point Energies= -816.834172  
 Sum of electronic and thermal Energies= -816.818503  
 Sum of electronic and thermal Enthalpies= -816.817559  
 Sum of electronic and thermal Free Energies= -816.880131  
 Counterpoise: corrected energy = -817.062888119177  
 Counterpoise: BSSE energy = 0.001374135768

**No imaginary vibrational frequency**

TS1-2

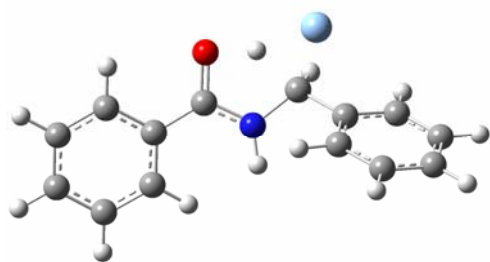


---

| Center Number | Atomic Number | Atomic Type | Coordinates (Angstroms) |           |           |
|---------------|---------------|-------------|-------------------------|-----------|-----------|
|               |               |             | X                       | Y         | Z         |
| 1             | 6             | 0           | 4.810405                | 1.755955  | 0.016624  |
| 2             | 6             | 0           | 3.502746                | 1.432447  | -0.320384 |
| 3             | 6             | 0           | 3.053798                | 0.107900  | -0.196248 |
| 4             | 6             | 0           | 3.935045                | -0.888150 | 0.251300  |
| 5             | 6             | 0           | 5.240209                | -0.555690 | 0.591471  |



|    |    |   |           |           |           |
|----|----|---|-----------|-----------|-----------|
| 6  | 6  | 0 | 5.677882  | 0.763802  | 0.476659  |
| 7  | 1  | 0 | 5.157548  | 2.776592  | -0.087410 |
| 8  | 1  | 0 | 2.854670  | 2.211976  | -0.705432 |
| 9  | 1  | 0 | 3.586441  | -1.909980 | 0.328377  |
| 10 | 1  | 0 | 5.918123  | -1.324608 | 0.941349  |
| 11 | 1  | 0 | 6.698131  | 1.019454  | 0.737565  |
| 12 | 6  | 0 | 1.682714  | -0.276821 | -0.533913 |
| 13 | 8  | 0 | 1.309355  | -1.487158 | -0.626613 |
| 14 | 7  | 0 | 0.698348  | 0.618496  | -0.748837 |
| 15 | 1  | 0 | 0.817422  | 1.607217  | -0.577707 |
| 16 | 6  | 0 | -0.609735 | 0.048761  | -1.027627 |
| 17 | 1  | 0 | 0.058176  | -1.214717 | -0.728756 |
| 18 | 1  | 0 | -0.755397 | -0.078064 | -2.101884 |
| 19 | 6  | 0 | -1.745490 | 0.854662  | -0.422475 |
| 20 | 6  | 0 | -1.732073 | 1.241735  | 0.934296  |
| 21 | 6  | 0 | -2.830570 | 1.248755  | -1.221337 |
| 22 | 6  | 0 | -2.780121 | 1.989482  | 1.468319  |
| 23 | 1  | 0 | -0.883977 | 0.984827  | 1.563203  |
| 24 | 6  | 0 | -3.878773 | 1.989064  | -0.677861 |
| 25 | 1  | 0 | -2.845674 | 0.986222  | -2.273966 |
| 26 | 6  | 0 | -3.857647 | 2.361654  | 0.665145  |
| 27 | 1  | 0 | -2.749907 | 2.286768  | 2.510007  |
| 28 | 1  | 0 | -4.705801 | 2.288243  | -1.310976 |
| 29 | 1  | 0 | -4.669629 | 2.945625  | 1.081009  |
| 30 | 47 | 0 | -1.843697 | -1.647938 | 0.230969  |

---

Zero-point correction= 0.224103 (Hartree/Particle)  
 Thermal correction to Energy= 0.239710  
 Thermal correction to Enthalpy= 0.240654  
 Thermal correction to Gibbs Free Energy= 0.177016  
 Sum of electronic and zero-point Energies= -816.761100  
 Sum of electronic and thermal Energies= -816.745493  
 Sum of electronic and thermal Enthalpies= -816.744549  
 Sum of electronic and thermal Free Energies= -816.808187  
 Counterpoise: corrected energy = -816.984119507039  
 Counterpoise: BSSE energy = 0.001083302854  
**One imaginary vibrational frequency: -1477.72**

SC2-2

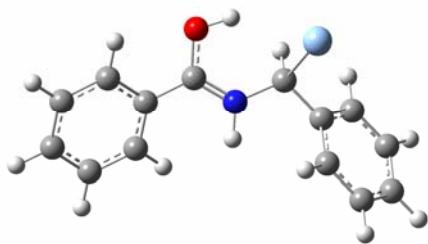

| Center Number | Atomic Number | Atomic Type | Coordinates (Angstroms) |           |           |
|---------------|---------------|-------------|-------------------------|-----------|-----------|
|               |               |             | X                       | Y         | Z         |
| 1             | 6             | 0           | -4.327579               | 2.104907  | -0.229058 |
| 2             | 6             | 0           | -3.072214               | 1.604845  | 0.084576  |
| 3             | 6             | 0           | -2.884990               | 0.217748  | 0.225659  |
| 4             | 6             | 0           | -3.977494               | -0.653579 | 0.072856  |
| 5             | 6             | 0           | -5.228800               | -0.142055 | -0.244380 |
| 6             | 6             | 0           | -5.405126               | 1.232936  | -0.398774 |
| 7             | 1             | 0           | -4.472051               | 3.173763  | -0.326221 |
| 8             | 1             | 0           | -2.260105               | 2.302295  | 0.259255  |
| 9             | 1             | 0           | -3.837357               | -1.719700 | 0.192917  |
| 10            | 1             | 0           | -6.067642               | -0.815432 | -0.370042 |
| 11            | 1             | 0           | -6.384387               | 1.628334  | -0.641204 |
| 12            | 6             | 0           | -1.574988               | -0.339349 | 0.531041  |
| 13            | 8             | 0           | -1.533674               | -1.562130 | 1.015073  |
| 14            | 7             | 0           | -0.448139               | 0.310135  | 0.327650  |
| 15            | 1             | 0           | -0.512600               | 1.209768  | -0.137068 |
| 16            | 6             | 0           | 0.890199                | -0.137768 | 0.673172  |
| 17            | 1             | 0           | -0.622772               | -1.919971 | 0.983045  |
| 18            | 1             | 0           | 0.920972                | -0.396524 | 1.730934  |
| 19            | 6             | 0           | 1.922395                | 0.883366  | 0.323357  |
| 20            | 6             | 0           | 1.947345                | 1.512611  | -0.932150 |
| 21            | 6             | 0           | 2.889368                | 1.238405  | 1.274489  |
| 22            | 6             | 0           | 2.902913                | 2.483333  | -1.218012 |
| 23            | 1             | 0           | 1.241279                | 1.224924  | -1.706333 |
| 24            | 6             | 0           | 3.853337                | 2.198376  | 0.979206  |
| 25            | 1             | 0           | 2.883150                | 0.768296  | 2.252379  |
| 26            | 6             | 0           | 3.861277                | 2.827043  | -0.264744 |
| 27            | 1             | 0           | 2.909468                | 2.959814  | -2.191259 |
| 28            | 1             | 0           | 4.592415                | 2.462309  | 1.726340  |
| 29            | 1             | 0           | 4.610322                | 3.575756  | -0.492254 |
| 30            | 47            | 0           | 1.524081                | -2.006648 | -0.360810 |

Zero-point correction= 0.229630 (Hartree/Particle)  
 Thermal correction to Energy= 0.245275

Thermal correction to Enthalpy= 0.246219  
 Thermal correction to Gibbs Free Energy= 0.183353  
 Sum of electronic and zero-point Energies= -816.787659  
 Sum of electronic and thermal Energies= -816.772014  
 Sum of electronic and thermal Enthalpies= -816.771070  
 Sum of electronic and thermal Free Energies= -816.833936

**No imaginary vibrational frequency**

TS2-2

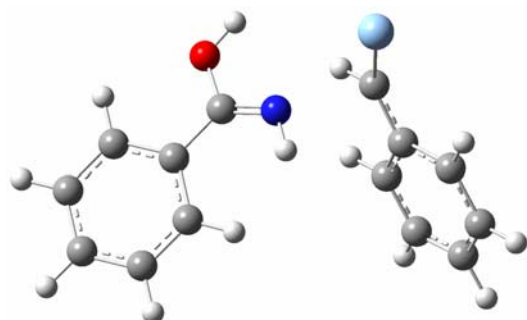

| Center Number | Atomic Number | Atomic Type | Coordinates (Angstroms) |           |           |
|---------------|---------------|-------------|-------------------------|-----------|-----------|
|               |               |             | X                       | Y         | Z         |
| 1             | 6             | 0           | -4.158136               | 1.438991  | -1.261450 |
| 2             | 6             | 0           | -2.949101               | 0.805845  | -0.978508 |
| 3             | 6             | 0           | -2.892032               | -0.217877 | -0.010741 |
| 4             | 6             | 0           | -4.067048               | -0.589451 | 0.673632  |
| 5             | 6             | 0           | -5.274625               | 0.048045  | 0.385438  |
| 6             | 6             | 0           | -5.324009               | 1.059750  | -0.581434 |
| 7             | 1             | 0           | -4.194094               | 2.226746  | -2.005533 |
| 8             | 1             | 0           | -2.053193               | 1.124999  | -1.502763 |
| 9             | 1             | 0           | -4.023557               | -1.374199 | 1.417689  |
| 10            | 1             | 0           | -6.175734               | -0.245137 | 0.912099  |
| 11            | 1             | 0           | -6.264290               | 1.552231  | -0.804215 |
| 12            | 6             | 0           | -1.624536               | -0.902265 | 0.285346  |
| 13            | 8             | 0           | -1.678405               | -1.678644 | 1.410088  |
| 14            | 7             | 0           | -0.503324               | -0.850403 | -0.373712 |
| 15            | 1             | 0           | -0.521241               | -0.281250 | -1.220174 |
| 16            | 6             | 0           | 1.675585                | -0.230529 | 0.832500  |
| 17            | 1             | 0           | -0.863745               | -2.209839 | 1.521240  |
| 18            | 1             | 0           | 1.070901                | -0.380915 | 1.731404  |
| 19            | 6             | 0           | 1.941924                | 1.125428  | 0.513154  |
| 20            | 6             | 0           | 2.788997                | 1.471994  | -0.583128 |
| 21            | 6             | 0           | 1.411029                | 2.180414  | 1.322624  |
| 22            | 6             | 0           | 3.086841                | 2.800187  | -0.857142 |

|    |    |   |          |           |           |
|----|----|---|----------|-----------|-----------|
| 23 | 1  | 0 | 3.209334 | 0.673601  | -1.186451 |
| 24 | 6  | 0 | 1.720668 | 3.506197  | 1.048700  |
| 25 | 1  | 0 | 0.765828 | 1.929202  | 2.158695  |
| 26 | 6  | 0 | 2.554884 | 3.815086  | -0.040836 |
| 27 | 1  | 0 | 3.734823 | 3.057679  | -1.686773 |
| 28 | 1  | 0 | 1.323895 | 4.301165  | 1.669367  |
| 29 | 1  | 0 | 2.796339 | 4.851699  | -0.251760 |
| 30 | 47 | 0 | 2.017077 | -1.993934 | -0.295882 |

---

Zero-point correction= 0.225191 (Hartree/Particle)  
 Thermal correction to Energy= 0.240872  
 Thermal correction to Enthalpy= 0.241816  
 Thermal correction to Gibbs Free Energy= 0.179323  
 Sum of electronic and zero-point Energies= -816.734813  
 Sum of electronic and thermal Energies= -816.719132  
 Sum of electronic and thermal Enthalpies= -816.718188  
 Sum of electronic and thermal Free Energies= -816.780681  
 Counterpoise: corrected energy = -816.958225960824  
 Counterpoise: BSSE energy = 0.001777848945

**One imaginary vibrational frequency: -92.7392**

SC3-2

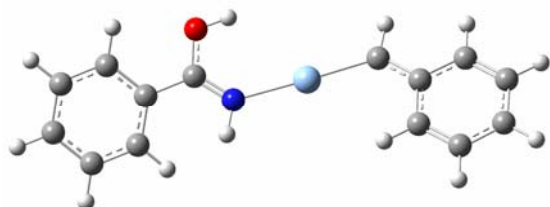


---

| Center Number | Atomic Number | Atomic Type | Coordinates (Angstroms) |           |           |
|---------------|---------------|-------------|-------------------------|-----------|-----------|
|               |               |             | X                       | Y         | Z         |
| 1             | 6             | 0           | 5.419049                | 1.783177  | -0.455526 |
| 2             | 6             | 0           | 4.120577                | 1.291460  | -0.465582 |
| 3             | 6             | 0           | 3.847976                | 0.009043  | 0.035219  |
| 4             | 6             | 0           | 4.898603                | -0.777251 | 0.531531  |
| 5             | 6             | 0           | 6.194997                | -0.275389 | 0.546278  |
| 6             | 6             | 0           | 6.457103                | 1.002387  | 0.054984  |
| 7             | 1             | 0           | 5.624776                | 2.769311  | -0.853573 |
| 8             | 1             | 0           | 3.332778                | 1.899692  | -0.896215 |
| 9             | 1             | 0           | 4.694260                | -1.769451 | 0.910904  |
| 10            | 1             | 0           | 7.001054                | -0.882917 | 0.939324  |
| 11            | 1             | 0           | 7.469491                | 1.388762  | 0.062728  |

|    |    |   |           |           |           |
|----|----|---|-----------|-----------|-----------|
| 12 | 6  | 0 | 2.472613  | -0.518763 | 0.044611  |
| 13 | 8  | 0 | 2.405906  | -1.845784 | 0.149349  |
| 14 | 7  | 0 | 1.389979  | 0.186128  | -0.030292 |
| 15 | 1  | 0 | 1.584490  | 1.180995  | -0.044024 |
| 16 | 6  | 0 | -2.678732 | -0.962908 | -0.266487 |
| 17 | 1  | 0 | 1.484626  | -2.132652 | 0.227792  |
| 18 | 1  | 0 | -2.873908 | -2.006324 | -0.531124 |
| 19 | 6  | 0 | -3.861397 | -0.241938 | -0.066198 |
| 20 | 6  | 0 | -3.830667 | 1.141411  | 0.291178  |
| 21 | 6  | 0 | -5.136345 | -0.875684 | -0.213724 |
| 22 | 6  | 0 | -5.000739 | 1.843909  | 0.487295  |
| 23 | 1  | 0 | -2.867245 | 1.624325  | 0.405553  |
| 24 | 6  | 0 | -6.303117 | -0.166376 | -0.015410 |
| 25 | 1  | 0 | -5.170076 | -1.924904 | -0.485144 |
| 26 | 6  | 0 | -6.232250 | 1.189317  | 0.333949  |
| 27 | 1  | 0 | -4.976966 | 2.891961  | 0.758549  |
| 28 | 1  | 0 | -7.267081 | -0.646915 | -0.127151 |
| 29 | 1  | 0 | -7.150543 | 1.745087  | 0.489571  |
| 30 | 47 | 0 | -0.682314 | -0.368680 | -0.146652 |

---

Zero-point correction= 0.227387 (Hartree/Particle)  
 Thermal correction to Energy= 0.244001  
 Thermal correction to Enthalpy= 0.244945  
 Thermal correction to Gibbs Free Energy= 0.177672  
 Sum of electronic and zero-point Energies= -816.783508  
 Sum of electronic and thermal Energies= -816.766895  
 Sum of electronic and thermal Enthalpies= -816.765950  
 Sum of electronic and thermal Free Energies= -816.833223  
 Counterpoise: corrected energy = -817.009129693597  
 Counterpoise: BSSE energy = 0.001765524321

**No imaginary vibrational frequency**

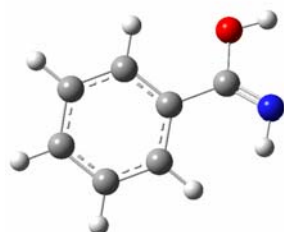


---

| Center Number | Atomic Number | Atomic Type | Coordinates (Angstroms) |   |   |
|---------------|---------------|-------------|-------------------------|---|---|
|               |               |             | X                       | Y | Z |

---

|    |   |   |           |           |           |
|----|---|---|-----------|-----------|-----------|
| 1  | 6 | 0 | 1.918207  | 1.176402  | -0.106790 |
| 2  | 6 | 0 | 0.528437  | 1.220373  | -0.113911 |
| 3  | 6 | 0 | -0.222001 | 0.043076  | -0.003013 |
| 4  | 6 | 0 | 0.448330  | -1.182590 | 0.099245  |
| 5  | 6 | 0 | 1.840099  | -1.223962 | 0.112471  |
| 6  | 6 | 0 | 2.578415  | -0.046762 | 0.010114  |
| 7  | 1 | 0 | 2.486107  | 2.094986  | -0.199465 |
| 8  | 1 | 0 | 0.029043  | 2.176405  | -0.224103 |
| 9  | 1 | 0 | -0.126888 | -2.095745 | 0.173604  |
| 10 | 1 | 0 | 2.347847  | -2.177711 | 0.200409  |
| 11 | 1 | 0 | 3.661982  | -0.080794 | 0.016620  |
| 12 | 6 | 0 | -1.709823 | 0.093832  | 0.012085  |
| 13 | 8 | 0 | -2.271006 | -1.118225 | -0.234210 |
| 14 | 7 | 0 | -2.476075 | 1.085783  | 0.226549  |
| 15 | 1 | 0 | -1.958943 | 1.935867  | 0.431308  |
| 16 | 1 | 0 | -3.228559 | -0.989898 | -0.171747 |

---

|                                              |                             |
|----------------------------------------------|-----------------------------|
| Zero-point correction=                       | 0.123150 (Hartree/Particle) |
| Thermal correction to Energy=                | 0.130679                    |
| Thermal correction to Enthalpy=              | 0.131623                    |
| Thermal correction to Gibbs Free Energy=     | 0.090542                    |
| Sum of electronic and zero-point Energies=   | -400.926236                 |
| Sum of electronic and thermal Energies=      | -400.918707                 |
| Sum of electronic and thermal Enthalpies=    | -400.917763                 |
| Sum of electronic and thermal Free Energies= | -400.958844                 |

**No imaginary vibrational frequency**

Ion B

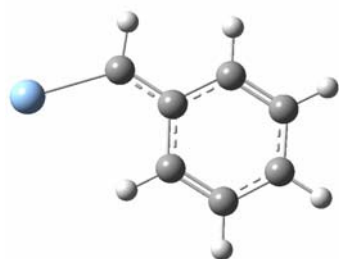


---

| Center Number | Atomic Number | Atomic Type | Coordinates (Angstroms) |           |           |
|---------------|---------------|-------------|-------------------------|-----------|-----------|
|               |               |             | X                       | Y         | Z         |
| 1             | 6             | 0           | 3.679650                | -0.550932 | -0.000048 |
| 2             | 6             | 0           | 2.608794                | -1.460402 | 0.000042  |
| 3             | 6             | 0           | 1.317384                | -0.984271 | 0.000041  |
| 4             | 6             | 0           | 1.059550                | 0.425229  | 0.000106  |

|    |    |   |           |           |           |
|----|----|---|-----------|-----------|-----------|
| 5  | 6  | 0 | 2.180270  | 1.323945  | -0.000004 |
| 6  | 6  | 0 | 3.468838  | 0.836229  | -0.000105 |
| 7  | 1  | 0 | 4.695488  | -0.931234 | -0.000128 |
| 8  | 1  | 0 | 2.805297  | -2.525166 | 0.000084  |
| 9  | 1  | 0 | 0.474815  | -1.665989 | 0.000110  |
| 10 | 1  | 0 | 1.995130  | 2.392013  | -0.000017 |
| 11 | 1  | 0 | 4.314782  | 1.512173  | -0.000188 |
| 12 | 6  | 0 | -0.233727 | 0.930569  | 0.000254  |
| 13 | 1  | 0 | -0.292989 | 2.020603  | -0.000102 |
| 14 | 47 | 0 | -2.095257 | -0.083502 | -0.000032 |

---

|                                              |                             |
|----------------------------------------------|-----------------------------|
| Zero-point correction=                       | 0.102205 (Hartree/Particle) |
| Thermal correction to Energy=                | 0.109612                    |
| Thermal correction to Enthalpy=              | 0.110557                    |
| Thermal correction to Gibbs Free Energy=     | 0.068290                    |
| Sum of electronic and zero-point Energies=   | -415.795415                 |
| Sum of electronic and thermal Energies=      | -415.788008                 |
| Sum of electronic and thermal Enthalpies=    | -415.787063                 |
| Sum of electronic and thermal Free Energies= | -415.829330                 |

**No imaginary vibrational frequency**

TS3-2

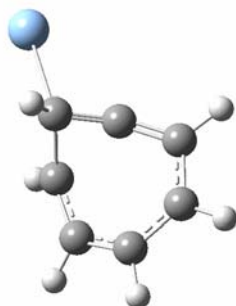


---

| Center Number | Atomic Number | Atomic Type | Coordinates (Angstroms) |           |           |
|---------------|---------------|-------------|-------------------------|-----------|-----------|
|               |               |             | X                       | Y         | Z         |
| 1             | 6             | 0           | 3.367563                | -0.451050 | 0.165778  |
| 2             | 6             | 0           | 3.181050                | 0.919263  | 0.003040  |
| 3             | 6             | 0           | 1.925977                | 1.519072  | -0.248780 |
| 4             | 6             | 0           | 0.889541                | 0.691716  | -0.009850 |
| 5             | 6             | 0           | 1.001540                | -1.146280 | -0.243609 |
| 6             | 6             | 0           | 2.372122                | -1.395157 | -0.118798 |
| 7             | 1             | 0           | 4.381056                | -0.806639 | 0.307300  |
| 8             | 1             | 0           | 4.036945                | 1.581040  | 0.078405  |
| 9             | 1             | 0           | 1.814399                | 2.571235  | -0.479677 |

|    |    |   |           |           |           |
|----|----|---|-----------|-----------|-----------|
| 10 | 1  | 0 | 0.463534  | -1.723061 | -0.987023 |
| 11 | 1  | 0 | 2.710269  | -2.370665 | -0.460788 |
| 12 | 6  | 0 | 0.174956  | -0.226259 | 0.653376  |
| 13 | 1  | 0 | 0.103225  | -0.248504 | 1.741333  |
| 14 | 47 | 0 | -1.935871 | 0.032527  | -0.029925 |

---

|                                              |                             |
|----------------------------------------------|-----------------------------|
| Zero-point correction=                       | 0.098937 (Hartree/Particle) |
| Thermal correction to Energy=                | 0.106331                    |
| Thermal correction to Enthalpy=              | 0.107276                    |
| Thermal correction to Gibbs Free Energy=     | 0.064929                    |
| Sum of electronic and zero-point Energies=   | -415.723889                 |
| Sum of electronic and thermal Energies=      | -415.716495                 |
| Sum of electronic and thermal Enthalpies=    | -415.715550                 |
| Sum of electronic and thermal Free Energies= | -415.757897                 |

**One imaginary vibrational frequency: -500.133**

Ion B'

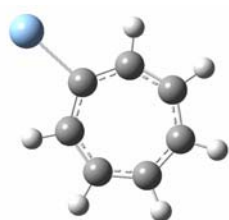


---

| Center Number | Atomic Number | Atomic Type | Coordinates (Angstroms) |           |           |
|---------------|---------------|-------------|-------------------------|-----------|-----------|
|               |               |             | X                       | Y         | Z         |
| 1             | 6             | 0           | 3.318388                | 0.695771  | -0.000393 |
| 2             | 6             | 0           | 2.217428                | 1.557299  | 0.000406  |
| 3             | 6             | 0           | 0.852856                | 1.251965  | 0.000297  |
| 4             | 6             | 0           | 0.200219                | 0.000156  | 0.000258  |
| 5             | 6             | 0           | 2.217160                | -1.557356 | 0.000159  |
| 6             | 6             | 0           | 3.318250                | -0.696036 | -0.000541 |
| 7             | 1             | 0           | 4.294031                | 1.173041  | -0.000966 |
| 8             | 1             | 0           | 2.455930                | 2.617868  | 0.000837  |
| 9             | 1             | 0           | 0.208630                | 2.126232  | 0.000490  |
| 10            | 1             | 0           | 2.455451                | -2.617975 | 0.000487  |
| 11            | 1             | 0           | 4.293812                | -1.173487 | -0.001127 |
| 12            | 6             | 0           | 0.852619                | -1.251762 | 0.000632  |
| 13            | 1             | 0           | 0.208315                | -2.125960 | 0.001205  |
| 14            | 47            | 0           | -1.952717               | 0.000001  | -0.000124 |

---

|                        |                             |
|------------------------|-----------------------------|
| Zero-point correction= | 0.108016 (Hartree/Particle) |
|------------------------|-----------------------------|



Thermal correction to Energy= 0.115262  
 Thermal correction to Enthalpy= 0.116206  
 Thermal correction to Gibbs Free Energy= 0.074335  
 Sum of electronic and zero-point Energies= -414.245129  
 Sum of electronic and thermal Energies= -414.237884  
 Sum of electronic and thermal Enthalpies= -414.236940  
 Sum of electronic and thermal Free Energies= -414.278811

**No imaginary vibrational frequency**

TS1-3

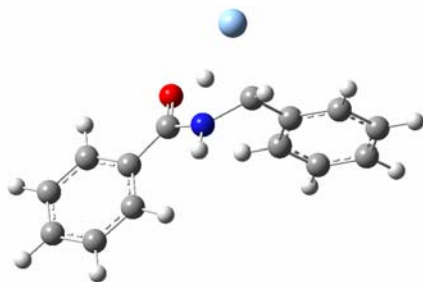

| Center Number | Atomic Number | Atomic Type | Coordinates (Angstroms) |           |           |
|---------------|---------------|-------------|-------------------------|-----------|-----------|
|               |               |             | X                       | Y         | Z         |
| 1             | 6             | 0           | 4.535410                | 1.405345  | 0.916974  |
| 2             | 6             | 0           | 3.188906                | 1.063042  | 0.938012  |
| 3             | 6             | 0           | 2.691599                | 0.109801  | 0.033086  |
| 4             | 6             | 0           | 3.559709                | -0.478554 | -0.902302 |
| 5             | 6             | 0           | 4.904534                | -0.136916 | -0.912085 |
| 6             | 6             | 0           | 5.393927                | 0.801932  | -0.002168 |
| 7             | 1             | 0           | 4.913325                | 2.148404  | 1.608322  |
| 8             | 1             | 0           | 2.537872                | 1.580686  | 1.634334  |
| 9             | 1             | 0           | 3.165658                | -1.201907 | -1.604651 |
| 10            | 1             | 0           | 5.572914                | -0.599417 | -1.628010 |
| 11            | 1             | 0           | 6.443851                | 1.069910  | -0.014186 |
| 12            | 6             | 0           | 1.279900                | -0.301951 | -0.011625 |
| 13            | 8             | 0           | 0.751536                | -0.894251 | -0.935917 |
| 14            | 7             | 0           | 0.494600                | -0.055042 | 1.170198  |
| 15            | 1             | 0           | 0.947422                | 0.409906  | 1.952386  |
| 16            | 6             | 0           | -1.031638               | -0.073203 | 1.163115  |
| 17            | 1             | 0           | -1.329352               | -0.147390 | 2.203289  |
| 18            | 1             | 0           | -0.138931               | -1.142056 | 1.222843  |
| 19            | 6             | 0           | -1.764989               | 0.987968  | 0.419174  |
| 20            | 6             | 0           | -1.255532               | 1.655721  | -0.702750 |
| 21            | 6             | 0           | -3.033766               | 1.346989  | 0.909307  |
| 22            | 6             | 0           | -1.995353               | 2.670368  | -1.307524 |
| 23            | 1             | 0           | -0.294162               | 1.392000  | -1.120722 |

|    |    |   |           |           |           |
|----|----|---|-----------|-----------|-----------|
| 24 | 6  | 0 | -3.769601 | 2.351111  | 0.293477  |
| 25 | 1  | 0 | -3.438028 | 0.846398  | 1.783461  |
| 26 | 6  | 0 | -3.251981 | 3.017357  | -0.818396 |
| 27 | 1  | 0 | -1.586893 | 3.184973  | -2.169087 |
| 28 | 1  | 0 | -4.741369 | 2.622874  | 0.688137  |
| 29 | 1  | 0 | -3.824583 | 3.802704  | -1.296831 |
| 30 | 47 | 0 | -1.583169 | -1.977486 | -0.086406 |

---

Zero-point correction= 0.223517 (Hartree/Particle)  
 Thermal correction to Energy= 0.239163  
 Thermal correction to Enthalpy= 0.240107  
 Thermal correction to Gibbs Free Energy= 0.176488  
 Sum of electronic and zero-point Energies= -816.709521  
 Sum of electronic and thermal Energies= -816.693875  
 Sum of electronic and thermal Enthalpies= -816.692931  
 Sum of electronic and thermal Free Energies= -816.756549  
 Counterpoise: corrected energy = -817.040792094776  
 Counterpoise: BSSE energy = 0.001384897169

**One imaginary vibrational frequency: -1624.26**

SC3-3

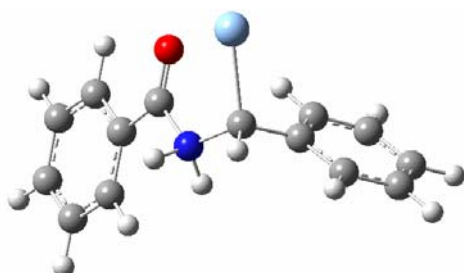


---

| Center Number | Atomic Number | Atomic Type | Coordinates (Angstroms) |           |           |
|---------------|---------------|-------------|-------------------------|-----------|-----------|
|               |               |             | X                       | Y         | Z         |
| 1             | 6             | 0           | 4.481966                | 1.206247  | 1.071859  |
| 2             | 6             | 0           | 3.157349                | 0.790741  | 1.076007  |
| 3             | 6             | 0           | 2.675349                | -0.032681 | 0.040552  |
| 4             | 6             | 0           | 3.546394                | -0.428821 | -0.993667 |
| 5             | 6             | 0           | 4.866093                | -0.005141 | -0.990942 |
| 6             | 6             | 0           | 5.334864                | 0.811649  | 0.040024  |
| 7             | 1             | 0           | 4.850438                | 1.837296  | 1.870943  |
| 8             | 1             | 0           | 2.528646                | 1.113516  | 1.897789  |
| 9             | 1             | 0           | 3.170709                | -1.064201 | -1.785440 |
| 10            | 1             | 0           | 5.531500                | -0.309631 | -1.789302 |
| 11            | 1             | 0           | 6.367050                | 1.141657  | 0.040601  |

|    |    |   |           |           |           |
|----|----|---|-----------|-----------|-----------|
| 12 | 6  | 0 | 1.304832  | -0.537717 | -0.037779 |
| 13 | 8  | 0 | 0.843119  | -1.281007 | -0.845127 |
| 14 | 7  | 0 | 0.351382  | -0.046864 | 1.117028  |
| 15 | 1  | 0 | 0.576502  | 0.938648  | 1.293891  |
| 16 | 6  | 0 | -1.164146 | -0.174683 | 0.960977  |
| 17 | 1  | 0 | -1.525827 | -0.276485 | 1.982202  |
| 18 | 1  | 0 | 0.634899  | -0.572218 | 1.948996  |
| 19 | 6  | 0 | -1.723378 | 1.057623  | 0.326537  |
| 20 | 6  | 0 | -1.275546 | 1.538846  | -0.915242 |
| 21 | 6  | 0 | -2.736517 | 1.767399  | 0.990506  |
| 22 | 6  | 0 | -1.811220 | 2.702509  | -1.461373 |
| 23 | 1  | 0 | -0.531003 | 0.989579  | -1.481400 |
| 24 | 6  | 0 | -3.286869 | 2.917112  | 0.430711  |
| 25 | 1  | 0 | -3.098835 | 1.414766  | 1.950891  |
| 26 | 6  | 0 | -2.821407 | 3.393201  | -0.793670 |
| 27 | 1  | 0 | -1.452382 | 3.058900  | -2.419948 |
| 28 | 1  | 0 | -4.072345 | 3.446573  | 0.957145  |
| 29 | 1  | 0 | -3.245462 | 4.291097  | -1.226761 |
| 30 | 47 | 0 | -1.749470 | -2.031300 | -0.058825 |

---

|                                              |                             |
|----------------------------------------------|-----------------------------|
| Zero-point correction=                       | 0.229775 (Hartree/Particle) |
| Thermal correction to Energy=                | 0.245642                    |
| Thermal correction to Enthalpy=              | 0.246586                    |
| Thermal correction to Gibbs Free Energy=     | 0.181267                    |
| Sum of electronic and zero-point Energies=   | -816.763465                 |
| Sum of electronic and thermal Energies=      | -816.747598                 |
| Sum of electronic and thermal Enthalpies=    | -816.746654                 |
| Sum of electronic and thermal Free Energies= | -816.811973                 |

**No imaginary vibrational frequency**

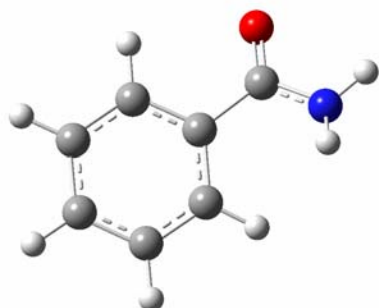


---

| Center<br>Number | Atomic<br>Number | Atomic<br>Type | Coordinates (Angstroms) |   |   |
|------------------|------------------|----------------|-------------------------|---|---|
|                  |                  |                | X                       | Y | Z |

---

|    |   |   |           |           |           |
|----|---|---|-----------|-----------|-----------|
| 1  | 6 | 0 | 0.516491  | -1.205596 | 0.127331  |
| 2  | 6 | 0 | -0.219613 | -0.024685 | -0.016677 |
| 3  | 6 | 0 | 0.458879  | 1.191824  | -0.157201 |
| 4  | 6 | 0 | 1.851508  | 1.226521  | -0.139868 |
| 5  | 6 | 0 | 2.577146  | 0.047671  | 0.022348  |
| 6  | 6 | 0 | 1.906625  | -1.168591 | 0.154661  |
| 7  | 1 | 0 | -0.021377 | -2.141591 | 0.213777  |
| 8  | 1 | 0 | -0.090532 | 2.112930  | -0.316276 |
| 9  | 1 | 0 | 2.368852  | 2.171376  | -0.261717 |
| 10 | 1 | 0 | 3.660891  | 0.075837  | 0.038126  |
| 11 | 1 | 0 | 2.468460  | -2.087878 | 0.275066  |
| 12 | 6 | 0 | -1.718689 | -0.136696 | -0.037501 |
| 13 | 8 | 0 | -2.285066 | -1.181225 | -0.314810 |
| 14 | 7 | 0 | -2.419043 | 1.007915  | 0.252917  |
| 15 | 1 | 0 | -3.419722 | 0.909346  | 0.334654  |
| 16 | 1 | 0 | -1.986830 | 1.771682  | 0.745872  |

---

|                                              |                             |
|----------------------------------------------|-----------------------------|
| Zero-point correction=                       | 0.122858 (Hartree/Particle) |
| Thermal correction to Energy=                | 0.130657                    |
| Thermal correction to Enthalpy=              | 0.131601                    |
| Thermal correction to Gibbs Free Energy=     | 0.090308                    |
| Sum of electronic and zero-point Energies=   | -400.947400                 |
| Sum of electronic and thermal Energies=      | -400.939601                 |
| Sum of electronic and thermal Enthalpies=    | -400.938657                 |
| Sum of electronic and thermal Free Energies= | -400.979950                 |

**No imaginary vibrational frequency**

TS2-3

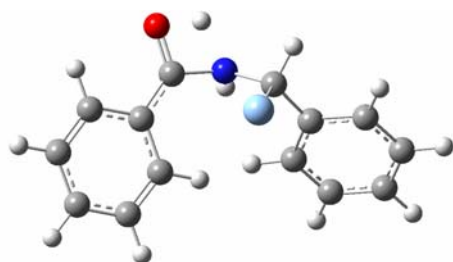


---

| Center Number | Atomic Number | Atomic Type | Coordinates (Angstroms) |          |           |
|---------------|---------------|-------------|-------------------------|----------|-----------|
|               |               |             | X                       | Y        | Z         |
| 1             | 6             | 0           | -2.494104               | 1.922029 | -1.390192 |
| 2             | 6             | 0           | -1.650305               | 1.341750 | -0.457908 |
| 3             | 6             | 0           | -2.191224               | 0.528359 | 0.561640  |

|    |    |   |           |           |           |
|----|----|---|-----------|-----------|-----------|
| 4  | 6  | 0 | -3.585203 | 0.304165  | 0.623485  |
| 5  | 6  | 0 | -4.416279 | 0.888228  | -0.318030 |
| 6  | 6  | 0 | -3.872969 | 1.695480  | -1.321652 |
| 7  | 1  | 0 | -2.086049 | 2.551555  | -2.171162 |
| 8  | 1  | 0 | -0.583386 | 1.510397  | -0.519881 |
| 9  | 1  | 0 | -3.991271 | -0.317411 | 1.411686  |
| 10 | 1  | 0 | -5.485401 | 0.722425  | -0.272724 |
| 11 | 1  | 0 | -4.527278 | 2.152921  | -2.054791 |
| 12 | 6  | 0 | -1.372295 | -0.044067 | 1.588439  |
| 13 | 8  | 0 | -1.773615 | -0.694564 | 2.589621  |
| 14 | 7  | 0 | 0.066451  | 0.027778  | 1.805768  |
| 15 | 1  | 0 | 0.374757  | 0.973714  | 2.051042  |
| 16 | 6  | 0 | 1.036350  | -0.644755 | 0.883411  |
| 17 | 1  | 0 | -0.550138 | -0.656494 | 2.836422  |
| 18 | 1  | 0 | 1.417955  | -1.507473 | 1.424027  |
| 19 | 6  | 0 | 2.155662  | 0.237067  | 0.448622  |
| 20 | 6  | 0 | 2.058033  | 1.633342  | 0.349077  |
| 21 | 6  | 0 | 3.393660  | -0.359036 | 0.144285  |
| 22 | 6  | 0 | 3.155443  | 2.405646  | -0.034081 |
| 23 | 1  | 0 | 1.129775  | 2.152888  | 0.568288  |
| 24 | 6  | 0 | 4.481482  | 0.408959  | -0.245122 |
| 25 | 1  | 0 | 3.502170  | -1.436170 | 0.224138  |
| 26 | 6  | 0 | 4.368628  | 1.798534  | -0.338520 |
| 27 | 1  | 0 | 3.055900  | 3.483137  | -0.093777 |
| 28 | 1  | 0 | 5.425840  | -0.074370 | -0.466432 |
| 29 | 1  | 0 | 5.219682  | 2.397316  | -0.638946 |
| 30 | 47 | 0 | 0.094041  | -1.686906 | -0.821616 |

---

Zero-point correction= 0.224596 (Hartree/Particle)  
Thermal correction to Energy= 0.240083  
Thermal correction to Enthalpy= 0.241028  
Thermal correction to Gibbs Free Energy= 0.178302  
Sum of electronic and zero-point Energies= -816.707604  
Sum of electronic and thermal Energies= -816.692116  
Sum of electronic and thermal Enthalpies= -816.691172  
Sum of electronic and thermal Free Energies= -816.753897

**One imaginary vibrational frequency: -1790.8**

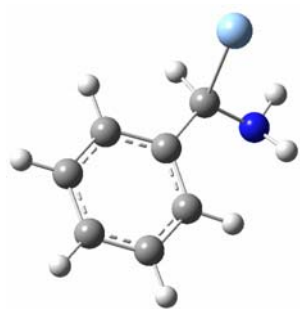

| Center Number | Atomic Number | Atomic Type | Coordinates (Angstroms) |           |           |
|---------------|---------------|-------------|-------------------------|-----------|-----------|
|               |               |             | X                       | Y         | Z         |
| 1             | 7             | 0           | 0.577160                | 2.279617  | 0.581921  |
| 2             | 1             | 0           | 0.517433                | 2.585453  | -0.380247 |
| 3             | 6             | 0           | 0.341457                | 0.887378  | 0.771917  |
| 4             | 1             | 0           | 0.578850                | 0.605952  | 1.794279  |
| 5             | 1             | 0           | 1.464103                | 2.577944  | 0.964511  |
| 6             | 6             | 0           | -0.991012               | 0.380724  | 0.362265  |
| 7             | 6             | 0           | -1.819111               | 1.070754  | -0.536116 |
| 8             | 6             | 0           | -1.480929               | -0.814878 | 0.920315  |
| 9             | 6             | 0           | -3.074009               | 0.571021  | -0.881611 |
| 10            | 1             | 0           | -1.496952               | 2.012561  | -0.963961 |
| 11            | 6             | 0           | -2.732512               | -1.307511 | 0.582317  |
| 12            | 1             | 0           | -0.857986               | -1.364706 | 1.619430  |
| 13            | 6             | 0           | -3.538336               | -0.620072 | -0.330608 |
| 14            | 1             | 0           | -3.694070               | 1.123261  | -1.579540 |
| 15            | 1             | 0           | -3.085524               | -2.229609 | 1.031158  |
| 16            | 1             | 0           | -4.514513               | -1.006436 | -0.599981 |
| 17            | 47            | 0           | 1.847133                | -0.452473 | -0.240212 |

|                                              |                             |
|----------------------------------------------|-----------------------------|
| Zero-point correction=                       | 0.129937 (Hartree/Particle) |
| Thermal correction to Energy=                | 0.138983                    |
| Thermal correction to Enthalpy=              | 0.139927                    |
| Thermal correction to Gibbs Free Energy=     | 0.093578                    |
| Sum of electronic and zero-point Energies=   | -472.022846                 |
| Sum of electronic and thermal Energies=      | -472.013800                 |
| Sum of electronic and thermal Enthalpies=    | -472.012856                 |
| Sum of electronic and thermal Free Energies= | -472.059205                 |

**No imaginary vibrational frequency**

2-methylphenylsilver cation

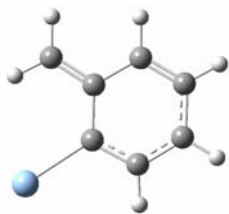

| Center Number | Atomic Number | Atomic Type | Coordinates (Angstroms) |           |           |
|---------------|---------------|-------------|-------------------------|-----------|-----------|
|               |               |             | X                       | Y         | Z         |
| 1             | 6             | 0           | 2.419638                | -1.521951 | 0.000635  |
| 2             | 6             | 0           | 3.260494                | -0.388139 | -0.000283 |
| 3             | 6             | 0           | 2.687890                | 0.852361  | -0.000891 |
| 4             | 6             | 0           | 1.244612                | 0.988364  | -0.000239 |
| 5             | 6             | 0           | 0.384958                | -0.187332 | 0.000126  |
| 6             | 6             | 0           | 1.021294                | -1.421974 | 0.000195  |
| 7             | 1             | 0           | 2.873246                | -2.508473 | 0.001744  |
| 8             | 1             | 0           | 4.336266                | -0.509197 | -0.000462 |
| 9             | 1             | 0           | 3.298197                | 1.748781  | -0.001959 |
| 10            | 1             | 0           | 0.448543                | -2.341091 | 0.000305  |
| 11            | 47            | 0           | -1.752697               | -0.113457 | -0.000116 |
| 12            | 6             | 0           | 0.718383                | 2.246710  | 0.000906  |
| 13            | 1             | 0           | -0.354664               | 2.405669  | 0.001988  |
| 14            | 1             | 0           | 1.351573                | 3.128542  | 0.001147  |

|                                              |                             |
|----------------------------------------------|-----------------------------|
| Zero-point correction=                       | 0.101695 (Hartree/Particle) |
| Thermal correction to Energy=                | 0.109358                    |
| Thermal correction to Enthalpy=              | 0.110302                    |
| Thermal correction to Gibbs Free Energy=     | 0.067804                    |
| Sum of electronic and zero-point Energies=   | -415.786055                 |
| Sum of electronic and thermal Energies=      | -415.778392                 |
| Sum of electronic and thermal Enthalpies=    | -415.777447                 |
| Sum of electronic and thermal Free Energies= | -415.819946                 |

**No imaginary vibrational frequency**

#### 4-methylphenylsilver cation

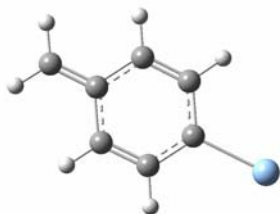

| Center Number | Atomic Number | Atomic Type | Coordinates (Angstroms) |           |           |
|---------------|---------------|-------------|-------------------------|-----------|-----------|
|               |               |             | X                       | Y         | Z         |
| 1             | 6             | 0           | 0.819978                | 1.225457  | 0.000081  |
| 2             | 6             | 0           | 2.189902                | 1.239209  | 0.000019  |
| 3             | 6             | 0           | 2.927941                | -0.000010 | -0.000079 |
| 4             | 6             | 0           | 2.189863                | -1.239213 | -0.000026 |
| 5             | 6             | 0           | 0.819948                | -1.225414 | 0.000059  |
| 6             | 6             | 0           | 0.095895                | 0.000039  | 0.000051  |
| 7             | 1             | 0           | 0.286485                | 2.167827  | 0.000153  |
| 8             | 1             | 0           | 2.738969                | 2.175111  | 0.000042  |
| 9             | 1             | 0           | 2.738915                | -2.175125 | -0.000099 |
| 10            | 1             | 0           | 0.286415                | -2.167762 | 0.000097  |
| 11            | 6             | 0           | 4.290830                | -0.000031 | -0.000141 |
| 12            | 1             | 0           | 4.857051                | 0.925703  | -0.000170 |
| 13            | 1             | 0           | 4.857024                | -0.925783 | 0.000825  |
| 14            | 47            | 0           | -2.037681               | -0.000004 | -0.000013 |

Zero-point correction= 0.101723 (Hartree/Particle)  
 Thermal correction to Energy= 0.109396  
 Thermal correction to Enthalpy= 0.110340  
 Thermal correction to Gibbs Free Energy= 0.067766  
 Sum of electronic and zero-point Energies= -415.786991  
 Sum of electronic and thermal Energies= -415.779318  
 Sum of electronic and thermal Enthalpies= -415.778373  
 Sum of electronic and thermal Free Energies= -415.820948

**No imaginary vibrational frequency**

### 3-methylphenylsilver cation

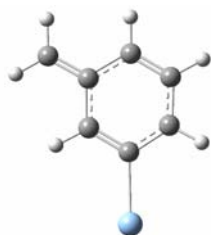

| Center Number | Atomic Number | Atomic Type | Coordinates (Angstroms) |          |           |
|---------------|---------------|-------------|-------------------------|----------|-----------|
|               |               |             | X                       | Y        | Z         |
| 1             | 6             | 0           | -0.707980               | 1.493143 | 0.000055  |
| 2             | 6             | 0           | -2.095803               | 1.769655 | -0.000045 |
| 3             | 6             | 0           | -2.990411               | 0.734111 | -0.000009 |



|    |    |   |           |           |           |
|----|----|---|-----------|-----------|-----------|
| 4  | 6  | 0 | -2.494052 | -0.618596 | -0.000043 |
| 5  | 6  | 0 | -1.065435 | -0.851763 | 0.000060  |
| 6  | 6  | 0 | -0.157094 | 0.188270  | 0.000048  |
| 7  | 1  | 0 | -0.039977 | 2.348487  | 0.000248  |
| 8  | 1  | 0 | -2.436414 | 2.798005  | -0.000090 |
| 9  | 1  | 0 | -4.060301 | 0.908676  | -0.000040 |
| 10 | 6  | 0 | -3.361968 | -1.671912 | -0.000065 |
| 11 | 1  | 0 | -3.006770 | -2.697636 | 0.000224  |
| 12 | 1  | 0 | -4.437145 | -1.522083 | 0.000151  |
| 13 | 1  | 0 | -0.739926 | -1.886644 | 0.000030  |
| 14 | 47 | 0 | 1.956532  | -0.132048 | -0.000011 |

---

|                                              |                             |
|----------------------------------------------|-----------------------------|
| Zero-point correction=                       | 0.101486 (Hartree/Particle) |
| Thermal correction to Energy=                | 0.109235                    |
| Thermal correction to Enthalpy=              | 0.110179                    |
| Thermal correction to Gibbs Free Energy=     | 0.067571                    |
| Sum of electronic and zero-point Energies=   | -415.783545                 |
| Sum of electronic and thermal Energies=      | -415.775795                 |
| Sum of electronic and thermal Enthalpies=    | -415.774851                 |
| Sum of electronic and thermal Free Energies= | -415.817460                 |

**No imaginary vibrational frequency**

Phenyl-2-yliummethyl silver cation

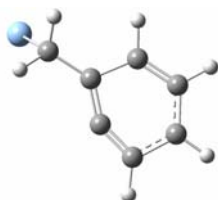


---

| Center Number | Atomic Number | Atomic Type | Coordinates (Angstroms) |           |           |
|---------------|---------------|-------------|-------------------------|-----------|-----------|
|               |               |             | X                       | Y         | Z         |
| 1             | 6             | 0           | 3.715628                | -0.092766 | -0.438524 |
| 2             | 6             | 0           | 3.035106                | 1.120665  | -0.297024 |
| 3             | 6             | 0           | 1.729810                | 1.170594  | 0.157341  |
| 4             | 6             | 0           | 0.945177                | -0.007136 | 0.526964  |
| 5             | 6             | 0           | 1.809212                | -0.983642 | 0.244575  |
| 6             | 6             | 0           | 3.055415                | -1.305273 | -0.091918 |
| 7             | 1             | 0           | 4.693880                | -0.167682 | -0.899522 |
| 8             | 1             | 0           | 3.545871                | 2.048117  | -0.525881 |
| 9             | 1             | 0           | 1.251697                | 2.113021  | 0.413434  |
| 10            | 1             | 0           | 3.469358                | -2.287193 | -0.280706 |

|    |    |   |           |           |           |
|----|----|---|-----------|-----------|-----------|
| 11 | 6  | 0 | -0.346508 | 0.040221  | 1.196255  |
| 12 | 1  | 0 | -0.506691 | 0.986784  | 1.705510  |
| 13 | 1  | 0 | -0.519079 | -0.806406 | 1.856296  |
| 14 | 47 | 0 | -2.034002 | -0.032822 | -0.213939 |

---

|                                              |                             |
|----------------------------------------------|-----------------------------|
| Zero-point correction=                       | 0.097941 (Hartree/Particle) |
| Thermal correction to Energy=                | 0.106208                    |
| Thermal correction to Enthalpy=              | 0.107152                    |
| Thermal correction to Gibbs Free Energy=     | 0.062504                    |
| Sum of electronic and zero-point Energies=   | -415.726265                 |
| Sum of electronic and thermal Energies=      | -415.717998                 |
| Sum of electronic and thermal Enthalpies=    | -415.717054                 |
| Sum of electronic and thermal Free Energies= | -415.761702                 |

**No imaginary vibrational frequency**
